# Supplementary material for: Indoxyl Sulfate as a Mediator Involved in Dysregulation of Pulmonary Aquaporin-5 in Acute Lung Injury Caused by Acute Kidney Injury
Source: PubMed Central journal article supplement (PMC5297646; doi:10.3390/ijms18010011), 2016-12-23
Supplement: ijms-18-00011-s001.pdf [file ijms-18-00011-s001.pdf]

## Supplementary Materials: Indoxyl Sulfate as a Mediator Involved in Dysregulation of Pulmonary Aquaporin-5 in Acute Lung Injury Caused by Acute Kidney Injury

Nozomi Yabuuchi, Masataka Sagata, Chika Saigo, Go Yoneda, Yuko Yamamoto, Yui Nomura, Kazuhiko Nishi, Rika Fujino, Hirofumi Jono and Hideyuki Saito

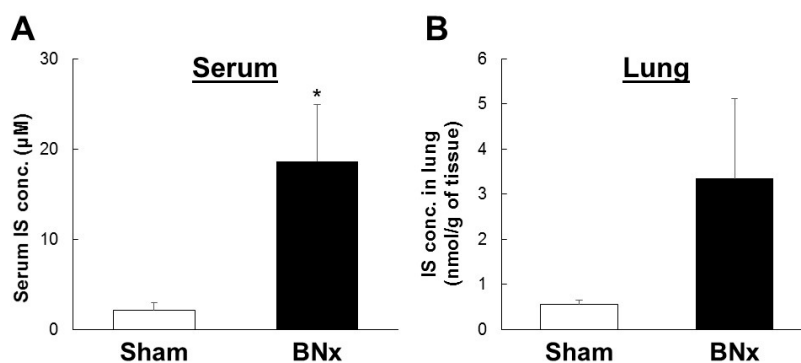

**Figure S1.** Accumulations of IS in serum and lung tissue at 4 h. Serum IS concentration (A); and IS accumulation in lung (B) were determined in sham-operated rats (sham) and BNx rats at 4 h. Each column represents the mean  $\pm$  S.D. \*  $p < 0.05$  versus sham.

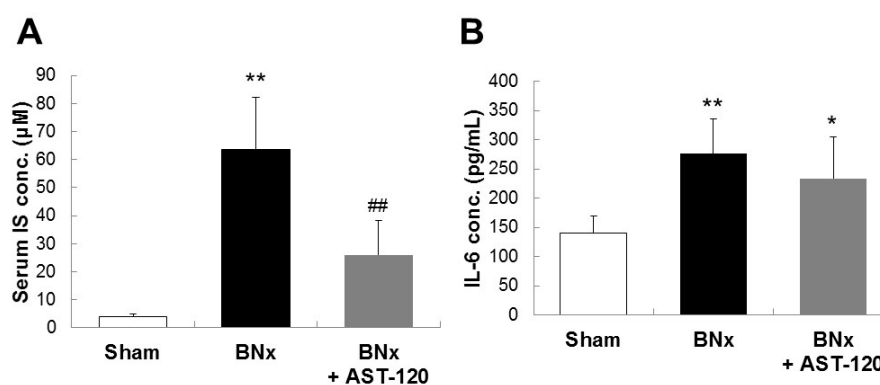

**Figure S2.** Serum accumulations of IS and IL-6 concentration in BNx rats at 4 h. Serum IS concentration (A); and IL-6 concentration (B) were determined in sham-operated rats (sham), BNx rats with (BNx + AST-120) or without (BNx) oral administration of AST-120 (2.5 g/kg) at 4 hr. Each column represents the mean  $\pm$  S.D. for 6 to 11 rats in each group. \*\*  $p < 0.01$  versus sham; \*  $p < 0.05$  versus sham; ##  $p < 0.01$  versus BNx.
